# Supplementary material
Source: MDPI journal article supplement (https://www.mdpi.com/2079-6412/8/4/128)
Supplement: s1 [file s1]

## Supplementary Material

**Table S1.** Precursor amounts to produce mixtures for viscosity measurement, and reaction mixtures for ATO coating deposition. Samples in bold are also bold in Table 1.

| Sample ID        | Butanol | Water | ECH  | PEG SS | CB   | Stock Paste | SbCl <sub>3</sub> | SnCl <sub>4</sub> ·5H <sub>2</sub> O |
|------------------|---------|-------|------|--------|------|-------------|-------------------|--------------------------------------|
| CB0-PEG6         | 9.00    | 0     | 4.50 | 2.05   | 0    | 0           | 0                 | 0                                    |
| CB0-PEG10        | 8.00    | 0     | 4.00 | 3.38   | 0    | 0           | 0                 | 0                                    |
| CB0-PEG14        | 7.05    | 0     | 3.51 | 4.70   | 0    | 0           | 0                 | 0                                    |
| CB3-PEG6         | 7.15    | 1.10  | 2.20 | 0      | 0    | 3.20        | 0                 | 0                                    |
| CB3-PEG10        | 8.20    | 0.61  | 2.35 | 1.35   | 0    | 4.00        | 0                 | 0                                    |
| CB3-PEG14        | 4.00    | 0.51  | 4.00 | 2.50   | 0    | 3.50        | 0                 | 0                                    |
| CB5-PEG6         | 7.69    | 1.20  | 2.32 | 0      | 0.32 | 3.50        | 0                 | 0                                    |
| CB5-PEG10        | 7.82    | 1.21  | 0    | 0      | 0.03 | 5.77        | 0                 | 0                                    |
| CB5-PEG14        | 7.05    | 0.25  | 0.52 | 1.48   | 0.07 | 5.40        | 0                 | 0                                    |
| CB7-PEG6         | 6.50    | 1.00  | 2.24 | 0      | 0.55 | 3.15        | 0                 | 0                                    |
| CB7-PEG10        | 7.53    | 1.16  | 0    | 0      | 0.32 | 5.75        | 0                 | 0                                    |
| CB7-PEG14        | 7.42    | 0.28  | 0.53 | 1.60   | 0.40 | 5.95        | 0                 | 0                                    |
| CB5-PEG10-ATO    | 6.50    | 1.00  | 0    | 0      | 0    | 5.70        | 0.05              | 1.00                                 |
| CB6.5-PEG5.6-ATO | 6.50    | 1.00  | 2.24 | 0      | 0.55 | 3.15        | 0.05              | 1.00                                 |
| CB7-PEG6-ATO     | 6.50    | 1.00  | 2.24 | 0      | 0.61 | 3.50        | 0.05              | 1.00                                 |
| CB7-PEG10-ATO    | 6.50    | 1.00  | 0    | 0      | 0.31 | 5.50        | 0.05              | 1.00                                 |

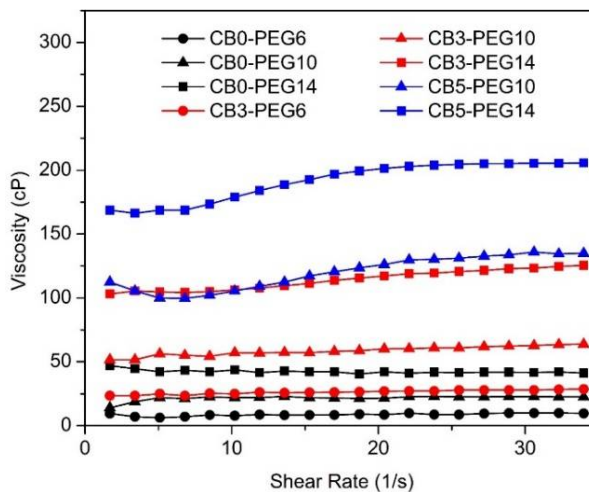

**Figure S1.** Viscosity profiles of the template mixtures vs. shear rate.

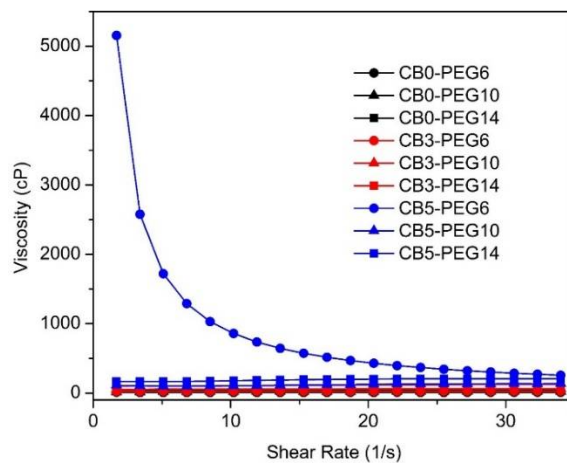

**Figure S2.** Viscosity profiles of the template mixtures vs. shear rate (Figure S1), and including the viscosity profile of the non-Newtonian sample CB5-PEG6, which also shows the instrument's limit.

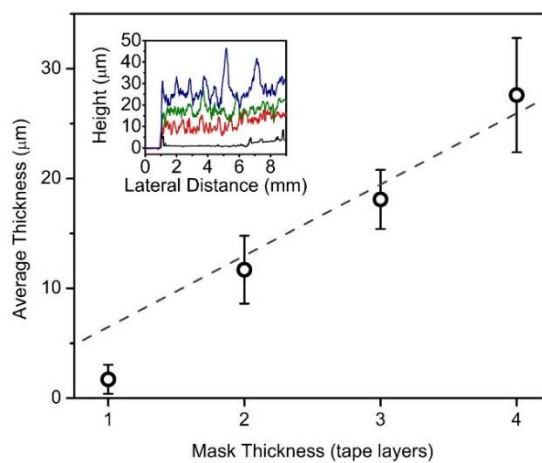

**Figure S3.** Stylus profilometry measurements of meso-macroporous ATO coatings with tape layers of 1× (black), 2× (red), 3× (green) and 4× (blue).

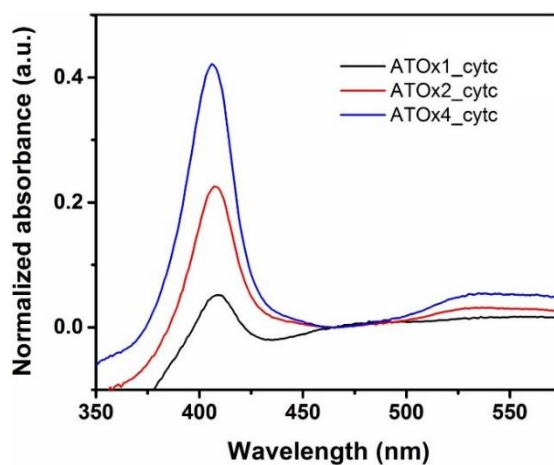

**Figure S4.** Absorbance spectra of cyt c soaked ATO coatings with tape layers of 1× (black), 2× (red), and 4× (blue).

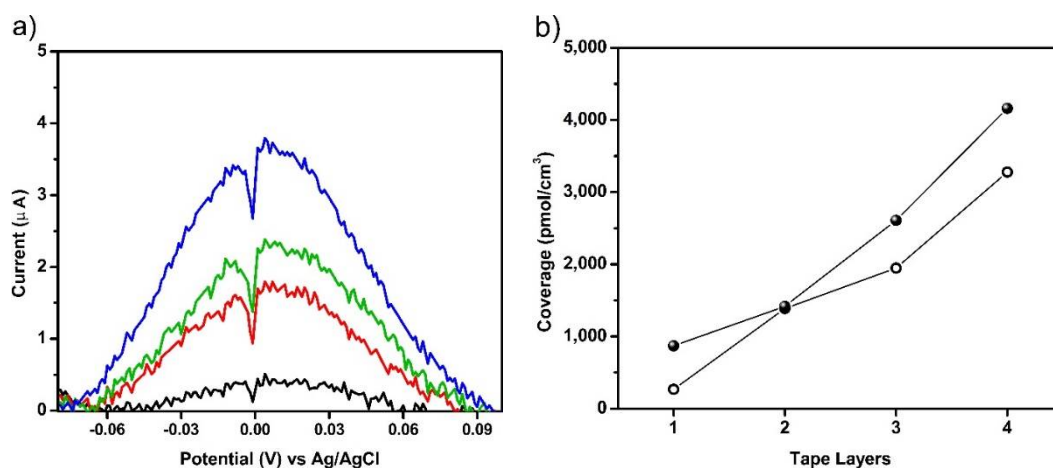

**Figure S5.** (a) Cyclic voltammograms from which the approximated ATO signal has been subtracted, and (b) Coverage of *cyt c* on the meso-macroporous electrodes calculated from cyclic voltammograms (circles) and by absorbance measurements (spheres).

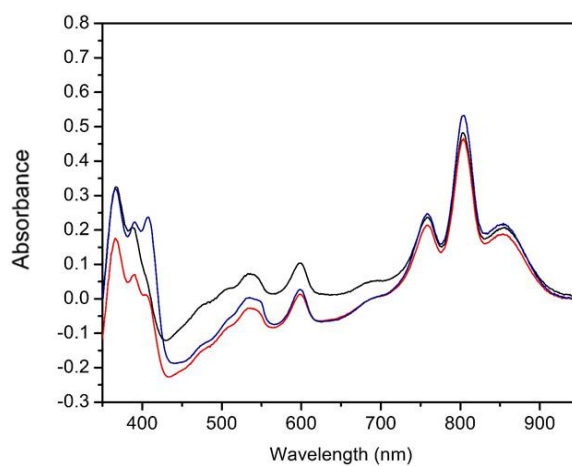

**Figure S6.** Absorbance spectra of the RC-treated ATO coatings, with tape layers of 1 $\times$  (black), 2 $\times$  (red), and 4 $\times$  (blue).

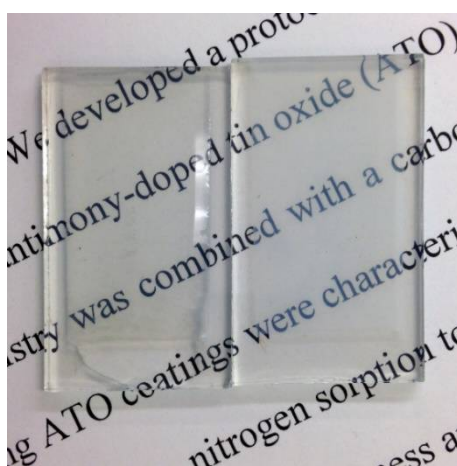

**Figure S7.** Photograph of 2 $\times$  thick CB5-PEG10-ATO coatings on FTO glass, and onto the left coating has been dropped enough water to saturate the coating.
